# Supplementary material for: Cell Wall Proteomics Reveal Phenotypic Adaption of Drug-Resistant Mycobacterium smegmatis to Subinhibitory Rifampicin Exposure
Source: Front Med (Lausanne). 2021 Oct 5;8:723667. doi: 10.3389/fmed.2021.723667 (PMC8525676; doi:10.3389/fmed.2021.723667)
Supplement: Supplementary file 1 [file Data_Sheet_1.XLSX]

## Sheet: All_Dysreg_Prots
Fraction	Unique.protein.IDs	Gene.Name	Protein.Description	pVal	logFC
CD	A0QQB8	MSMEG_0699	Conserved hypothetical proline rich protein	0	2.643
CD	A0QX92	MSMEG_3216	Peroxiredoxin Q	0.038	-2.347
CD	A0QVH8	Rip1	Zinc metalloprotease Rip1	0	2.314
CD	A0R0H2	MSMEG_4385	ABC transporter oligopeptide binding protein	0.048	-1.439
CD	A0QVI7	CobQ	Cobyric acid synthase	0.013	-1.432
CD	A0QNH6	SaeC	Putative ESX-1 scaffolding and assembly protein SaeC	0.042	-1.293
CD	A0QRE7	MSMEG_1090	Amidase	0.006	1.291
CD	A0R3Y8	MSMEG_5642	Acetyl-coenzyme a carboxylase carboxyl transferase	0.039	-1.237
CD	A0R3I6	MSMEG_5486	Peptidase S1 and S6, chymotrypsin/Hap	0.002	-1.111
CD	A0R3U0	MSMEG_5593	Pyruvate dehydrogenase	0.034	1.1
CD	A0QT41	MSMEG_1703	Amidohydrolase	0.017	1.075
CD	A0QXJ8	MSMEG_3328	Uncharacterized protein	0.011	0.99
CD	A0R3B6	MSMEG_5413	Exopolyphosphatase	0.016	0.881
CD	A0QY11	MSMEG_3495	MmpS5 protein	0	0.87
CD	A0QX77	NadC	Nicotinate-nucleotide pyrophosphorylase	0.006	0.842
CD	A0R4Z5	MSMEG_6008	Acetyl-CoA acetyltransferase	0.033	0.826
CD	A0QUY9	LeuC	3-isopropylmalate dehydratase large subunit	0.036	0.751
CD	A0QVZ5	MSMEG_2752	RNA polymerase sigma factor	0.009	0.731
CD	A0R5T0	MSMEG_6300	Transcriptional regulator, GntR family protein	0.043	0.726
CD	A0R555	MSMEG_6071	Metallo-beta-lactamase superfamily protein	0.041	-0.712
CD	A0R6D2	GlgX	Glycogen debranching enzyme GlgX	0.048	-0.655
CD	A0R326	MSMEG_5318	Glutamine ABC transporter, permease/substrate-binding protein	0.024	-0.608
CD	A0R5H1	MSMEG_6189	Transcriptional regulator, Crp/Fnr family protein	0.008	0.581
CD	A0QY24	MSMEG_3508	Hydrolase, alpha/beta hydrolase fold family protein	0.014	-0.566
CD	A0QTV6	MSMEG_1980	Monooxygenase	0.008	-0.526
CD	A0R292	MSMEG_5030	Uncharacterized protein	0.043	-0.483
CD	A0QZ47	PrcB	Proteasome subunit beta	0.035	0.459
CD	A0QPX6	MSMEG_0553	Probable sugar ABC transporter, substrate-binding protein, putative	0.004	-0.451
CD	A0R4I6	PurB	Adenylosuccinate lyase	0.011	0.439
CD	A0QZ49	Dop	Pup deamidase/depupylase	0.048	0.434
CD	A0R3T9	MSMEG_5592	Uncharacterized protein	0.016	0.433
CD	A0QYX6	MSMEG_3822	Regulatory protein GntR, HTH	0.013	0.416
CD	A0R639	MSMEG_6414	Uncharacterized protein	0.014	-0.411
CD	A0QS95	MSMEG_1397	Transcriptional regulator, TetR family protein	0.049	-0.408
CD	A0QWZ7	MSMEG_3120	Probable alpha-(1->6)-mannopyranosyltransferase MSMEG_3120/MSMEI_3041	0.023	0.386
CD	A0QTQ7	MSMEG_1929	Uncharacterized protein	0.045	-0.384
CD	A0QXF3	MSMEG_3280	Polyamine-binding lipoprotein	0.037	-0.359
CD	A0QPI4	MSMEG_0409	Condensation domain protein	0.023	0.355
CD	A0R368	MSMEG_5362	Uncharacterized protein	0.049	-0.354
CD	A0QQZ5	MSMEG_0930	Serine 3-dehydrogenase	0.035	0.352
CD	A0QUA0	MSMEG_2130	Putative acyl-CoA dehydrogenase	0.021	0.347
CD	A0QPV4	MSMEG_0531	Putative acyl-CoA dehydrogenase	0.047	0.336
CD	A0QZ85	MSMEG_3933	Uncharacterized protein	0.01	-0.331
CD	A0QWZ9	SufB	FeS assembly protein SufB	0.009	0.309
CD	A0R6D4	MSMEG_6509	ABC-type drug export system, ATP-binding protein	0.036	-0.306
CD	A0R4N5	MSMEG_5897	Virulence factor mce family protein	0.025	-0.305
CD	A0QW05	MSMEG_2761	Putative secreted alanine rich protein	0.047	-0.288
CD	A0R4P1	MSMEG_5903	Oxidoreductase, short chain dehydrogenase/reductase family protein	0.045	0.285
CD	A0R634	MSMEG_6409	Acyltransferase family protein	0.04	0.271
CD	A0QY12	MSMEG_3496	MmpL4 protein	0.01	0.265
CD	A0QR19	HemD	Uroporphyrinogen-III synthase	0.038	0.255
CD	A0QNS1	MSMEG_0143	Probable conserved mce associated membrane protein	0.001	-0.255
CD	A0QYB7	MSMEG_3602	Ribose transport ATP-binding protein RbsA	0.011	-0.249
CD	A0R3R8	MSMEG_5571	ABC transporter ATP-binding protein	0.004	-0.24
CD	A0QX86	ImpA	Inositol-1-monophosphatase ImpA	0.033	0.24
CD	A0R0W1	MSMEG_4527	Ferredoxin sulfite reductase	0.036	0.237
CD	A0QNP3	MSMEG_0116	Taurine import ATP-binding protein TauB	0.026	-0.222
CD	A0QVY4	MSMEG_2739	Uncharacterized protein	0.018	-0.218
CD	A0R201	AtpG	ATP synthase gamma chain	0.043	-0.198
CD	A0R730	MSMEG_6761	Glycerol-3-phosphate dehydrogenase	0.043	-0.157
CD	A0QYB6	MSMEG_3601	Ribose/xylose/arabinose/galactoside ABC-type transport systems, permease components	0.039	0.128
CD	A0R0R8	MSMEG_4484	Putative conserved transmembrane protein	0.043	-0.125
CD	A0QR05	MSMEG_0940	Uncharacterized protein	0.022	0.106
CW	A0QV41	MSMEG_2439	LppW protein	0.013	-2.846
CW	A0QVH8	Rip1	Zinc metalloprotease Rip1	0.009	2.549
CW	A0QQB8	MSMEG_0699	Conserved hypothetical proline rich protein	0	2.361
CW	A0QZI2	MSMEG_4034	NAD dependent epimerase/dehydratase family protein	0.001	-2.03
CW	A0QNR0	MSMEG_0132	Uncharacterized protein	0.03	-1.447
CW	A0QYD4	MSMEG_3619	Short chain dehydrogenase	0.036	-1.325
CW	A0QRP9	MSMEG_1195	Uncharacterized protein	0.019	1.32
CW	A0R1W4	MSMEG_4896	Non-ribosomal peptide synthetase	0.029	1.301
CW	A0QVI7	CobQ	Cobyric acid synthase	0.014	1.3
CW	A0QRG7	MSMEG_1111	Uncharacterized protein	0.004	-1.251
CW	A0R1D1	MSMEG_4709	Enoyl-CoA hydratase	0.001	1.163
CW	A0QWZ4	MSMEG_3117	Cytochrome aa3 controlling protein	0.015	-1.145
CW	A0R269	MSMEG_5005	LprC protein	0.024	-1.107
CW	A0R2D1	TatB	Sec-independent protein translocase protein TatB	0.043	-1.097
CW	A0QPE1	MSMEG_0366	Uncharacterized protein	0.032	-1.093
CW	A0R4C1	PstA	Phosphate transport system permease protein PstA	0.001	-1.065
CW	A0QQ99	MSMEG_0679	Uncharacterized protein	0.036	1.064
CW	A0QS40	MSMEG_1340	UPF0336 protein MSMEG_1340	0.012	1.061
CW	A0QSL5	RpsM	30S ribosomal protein S13	0	-1.059
CW	A0QX36	MSMEG_3159	Methylmalonyl-CoA mutase large subunit	0.036	1.058
CW	A0QR13	MSMEG_0948	UPF0336 protein MSMEG_0948	0.019	1.021
CW	A0R019	MraY	Phospho-N-acetylmuramoyl-pentapeptide-transferase	0.027	-1.007
CW	A0R3N3	PcrA	ATP-dependent DNA helicase	0.036	-0.997
CW	A0QP31	MSMEG_0254	Uncharacterized protein	0.042	0.986
CW	A0R3C8	Prs	Ribose-phosphate pyrophosphokinase	0.004	0.986
CW	A0QQF0	ClpB	Chaperone protein ClpB	0.037	0.937
CW	Q3L890	Gap	Peptidoglycolipid exporter Gap	0.026	-0.918
CW	A0R546	MSMEG_6062	Fe uptake system permease	0.047	0.906
CW	A0R3L3	MSMEG_5514	Uncharacterized protein	0.036	-0.851
CW	A0QU88	NagB	Glucosamine-6-phosphate deaminase	0.014	0.832
CW	A0R2C1	MSMEG_5059	ABC transporter, permease protein SugB	0.001	-0.783
CW	A0R3I6	MSMEG_5486	Peptidase S1 and S6, chymotrypsin/Hap	0.045	-0.78
CW	A0QPE5	MSMEG_0370	Uncharacterized protein	0.046	0.774
CW	A0R2X6	MSMEG_5268	Uncharacterized protein	0.008	-0.768
CW	A0QZC7	MSMEG_3977	Uncharacterized protein	0.006	-0.757
CW	A0R4L1	PhoP	DNA-binding response regulator PhoP	0.039	0.729
CW	A0R2C3	MSMEG_5061	Bacterial extracellular solute-binding protein	0.03	-0.71
CW	A0QNP2	MSMEG_0114	Extracellular solute-binding protein, family protein 3	0.009	-0.696
CW	A0QZ01	MSMEG_3848	Carboxylic ester hydrolase	0.013	-0.647
CW	A0QZ56	MSMEG_3904	LppK protein	0.05	-0.643
CW	A0R049	MSMEG_4260	Cytochrome c oxidase subunit 3	0.023	-0.616
CW	A0QWY8	MSMEG_3111	Extracellular solute-binding protein, family protein 1	0.038	-0.57
CW	A0QZ03	MSMEG_3851	LppI protein	0.025	-0.562
CW	A0QVX1	MSMEG_2725	Glutamate transporter permease protein GluD	0.034	-0.55
CW	A0R0A9	MSMEG_4322	Uncharacterized protein	0.035	-0.549
CW	A0QS51	MSMEG_1352	Hydrolase, alpha/beta fold family protein	0.038	0.549
CW	A0R6Z6	MSMEG_6726	ABC transporter, permease protein	0.044	-0.53
CW	A0R573	MSMEG_6090	Uncharacterized protein	0.015	-0.525
CW	A0QV22	MSMEG_2420	Uncharacterized protein	0.049	-0.521
CW	A0R1G0	MSMEG_4739	Uncharacterized protein	0.022	0.511
CW	A0QQ18	MSMEG_0595	Glycolate oxidase	0.023	0.484
CW	A0QXV0	MSMEG_3434	Peptidyl-prolyl cis-trans isomerase	0.036	-0.481
CW	A0R2V2	MSMEG_5244	Two component transcriptional regulatory protein devr	0.012	0.471
CW	A0R0H2	MSMEG_4385	ABC transporter oligopeptide binding protein	0.021	-0.471
CW	A0QWR1	AroB	3-dehydroquinate synthase	0.033	0.464
CW	A0QY93	MSMEG_3578	Putative cyclase	0.035	-0.462
CW	A0QTV6	MSMEG_1980	Monooxygenase	0.037	0.44
CW	A0R028	MSMEG_4239	LppM protein	0.004	-0.43
CW	A0QWL3	MSMEG_2982	Putative periplasmic binding protein	0.024	-0.407
CW	A0R1D0	MSMEG_4708	Putative methyltransferase	0.027	0.404
CW	A0QUI9	MSMEG_2225	Transcriptional regulator, TetR family protein	0.045	0.398
CW	A0QWS5	CarB	Carbamoyl-phosphate synthase large chain	0.041	0.393
CW	A0R0Z1	MSMEG_4557	ABC transporter, ATP-binding protein	0.005	0.393
CW	A0QVI3	MSMEG_2584	Penicillin-binding protein, putative	0.022	0.377
CW	A0QQG9	MSMEG_0750	Membrane protein	0.033	-0.361
CW	A0R3L2	MSMEG_5513	Serine/threonine-protein kinase PknE	0.011	0.357
CW	A0QPY5	MSMEG_0563	Uncharacterized protein	0.044	0.348
CW	A0QQF5	MSMEG_0737	Dehydrogenase	0.025	0.337
CW	A0QQ65	MSMEG_0643	Extracellular solute-binding protein, family protein 5, putative	0.001	-0.307
CW	A0R3I2	MscL	Large-conductance mechanosensitive channel	0.001	-0.245
CW	A0R0D6	MSMEG_4349	Conserved hypothetical proline rich protein	0.041	0.23
CW	A0QTE7	MSMEG_1813	Propionyl-CoA carboxylase beta chain	0.046	0.225
CW	A0QZX9	MSMEG_4188	Short chain dehydrogenase	0.041	0.212
Cyto	A0QVD8	MSMEG_2539	Thiopurine S-methyltransferase (Tpmt) superfamily protein	0	6.348
Cyto	A0R5E2	MSMEG_6160	ATP-dependent rna helicase, dead/deah box family protein	0.025	-3.802
Cyto	A0R037	MSMEG_4248	1-acylglycerol-3-phosphate O-acyltransferase	0.007	2.053
Cyto	A0QUL6	MSMEG_2252	Flavin-type hydroxylase	0	1.966
Cyto	A0QUX7	IlvH	Acetolactate synthase small subunit	0.013	-1.679
Cyto	A0QZ86	MSMEG_3935	Uncharacterized protein	0.003	1.587
Cyto	A0QV60	MSMEG_2458	Uncharacterized protein	0.013	1.382
Cyto	A0R4L0	MSMEG_5870	Sensor histidine kinase PhoR	0.034	1.333
Cyto	A0R129	LppH	Putative conserved lipoprotein lpph	0.005	-1.213
Cyto	A0QVD7	MSMEG_2538	MarR-family protein transcriptional regulator	0.001	1.128
Cyto	A0QVJ6	MSMEG_2597	Aldehyde dehydrogenase	0.035	1.048
Cyto	A0R111	RsfS	Ribosomal silencing factor RsfS	0.008	-1.007
Cyto	A0R4L2	MSMEG_5873	Uncharacterized protein	0.017	0.908
Cyto	A0R588	FtsH	ATP-dependent zinc metalloprotease FtsH	0.034	0.853
Cyto	A0QZZ0	MSMEG_4199	Uncharacterized protein	0.044	0.748
Cyto	A0QWH0	PdxT	Pyridoxal 5-phosphate synthase subunit PdxT	0.001	-0.748
Cyto	A0QRV0	MSMEG_1247	Uncharacterized protein	0	0.726
Cyto	A0R5H3	MSMEG_6191	Translation initiation inhibitor	0.044	-0.721
Cyto	A0QV53	MSMEG_2451	HAD-superfamily protein hydrolase, subfamily protein IIA	0.033	0.673
Cyto	A0QQD7	MSMEG_0717	Aldose 1-epimerase subfamily protein	0.034	-0.659
Cyto	A0R6L2	HrpA	ATP-dependent helicase HrpA	0.022	-0.605
Cyto	A0R5B1	MSMEG_6129	Uncharacterized protein	0.006	-0.586
Cyto	O52199	Dgt	Deoxyguanosinetriphosphate triphosphohydrolase-like protein	0	0.577
Cyto	A0QX91	MSMEG_3215	ABC-type molybdenum transport system, ATPase component/photorepair protein PhrA	0.037	0.554
Cyto	A0R7G7	MSMEG_6906	Putative hydrolase	0.005	-0.552
Cyto	A0QU47	MSMEG_2074	Uncharacterized protein	0.013	0.541
Cyto	A0R293	MSMEG_5029	Alkanal monooxygenase alpha chain	0.047	0.534
Cyto	A0QNZ6	MSMEG_0219	RNA polymerase sigma factor	0.018	-0.528
Cyto	A0R471	MSMEG_5726	Uncharacterized protein	0.023	0.523
Cyto	A0QR78	MSMEG_1015	Transcriptional regulator, TetR family protein	0.04	-0.514
Cyto	A0R538	BluB	Cob(II)yrinic acid a,c-diamide reductase	0.034	-0.496
Cyto	A0QS33	MSMEG_1331	Enoyl-CoA hydratase	0.014	-0.49
Cyto	A0QSE5	MSMEG_1451	Arylsulfatase	0.033	-0.469
Cyto	A0QSP0	MSMEG_1546	Coenzyme B12-dependent glycerol dehydrogenase small subunit	0.001	-0.469
Cyto	A0QVB6	MSMEG_2516	Putative oxidoreductase	0	0.461
Cyto	A0QX98	Lgt	Prolipoprotein diacylglyceryl transferase	0.046	-0.458
Cyto	A0QTS3	MSMEG_1945	Ion channel membrane protein	0.021	-0.453
Cyto	A0QW22	MSMEG_2779	Uncharacterized protein	0.007	0.437
Cyto	A0R477	MSMEG_5732	Monooxygenase	0.046	0.429
Cyto	A0QSL9	RplQ	50S ribosomal protein L17	0.002	0.421
Cyto	A0QU88	NagB	Glucosamine-6-phosphate deaminase	0.011	0.42
Cyto	A0QZJ0	MSMEG_4042	Transcriptional regulator, GntR family protein	0.029	-0.406
Cyto	A0QX75	NadA	Quinolinate synthase	0.004	0.4
Cyto	A0R523	MSMEG_6037	2-hydroxy-6-ketonona-2,4-dienedioic acid hydrolase	0.009	0.394
Cyto	A0R6C7	MSMEG_6502	Uncharacterized protein	0.035	-0.389
Cyto	A0R4E0	PurF	Amidophosphoribosyltransferase	0.046	0.388
Cyto	A0R0T8	DnaJ	Chaperone protein DnaJ	0.019	-0.38
Cyto	A0QWS9	Gmk	Guanylate kinase	0.013	-0.376
Cyto	A0QVQ0	MSMEG_2651	Alkanesulfonate monooxygenase family protein	0	-0.366
Cyto	A0QU81	MSMEG_2111	Secreted chorismate mutase	0.029	-0.365
Cyto	A0R5W6	MSMEG_6337	Phosphotransferase enzyme family protein	0.019	0.363
Cyto	A0QR19	HemD	Uroporphyrinogen-III synthase	0.015	0.359
Cyto	A0QTX2	MSMEG_1996	N5,N10-methylenetetrahydromethanopterin reductase-related protein	0.046	-0.359
Cyto	A0R2M2	MSMEG_5164	Zinc-type alcohol dehydrogenase-like protein	0.05	-0.355
Cyto	A0QV38	MSMEG_2436	UPF0109 protein MSMEG_2436	0.04	-0.354
Cyto	A0QXT8	MSMEG_3422	D-isomer specific 2-hydroxyacid dehydrogenase, NAD-binding	0.028	0.35
Cyto	A0R094	MSMEG_4305	Phosphoglycerate mutase	0.011	0.34
Cyto	A0QUI9	MSMEG_2225	Transcriptional regulator, TetR family protein	0.034	0.328
Cyto	A0QWS2	PyrC	Dihydroorotase	0.008	-0.324
Cyto	A0QW30	MSMEG_2787	Putative riboflavin biosynthesis protein RibD	0.05	-0.319
Cyto	A0R0N9	LtaE	L-threonine aldolase, low-specificity	0.033	0.306
Cyto	A0QYD8	UreG	Urease accessory protein UreG	0.009	-0.303
Cyto	A0QP38	MSMEG_0261	p40 protein	0.002	0.301
Cyto	A0R0S4	UppS	Decaprenyl diphosphate synthase	0.023	0.3
Cyto	A0QPM0	MSMEG_0445	Amidohydrolase family protein	0.043	0.299
Cyto	A0QZ48	Pup	Prokaryotic ubiquitin-like protein Pup	0.031	-0.297
Cyto	A0QUA6	Pgm	Phosphoglucomutase, alpha-D-glucose phosphate-specific	0.001	-0.296
Cyto	A0QQX4	MSMEG_0909	Acyl-ACP thioesterase superfamily protein	0.012	-0.294
Cyto	A0R7I2	MSMEG_6926	tRNA adenylyltransferase	0.018	0.286
Cyto	A0QUE0	MSMEG_2174	DNA helicase	0.033	0.284
Cyto	A0QT18	MSMEG_1680	Uncharacterized protein	0.03	-0.282
Cyto	A0QTR5	MSMEG_1937	Molybdopterin biosynthesis protein MoeB	0.042	0.282
Cyto	A0QWQ9	AroC	Chorismate synthase	0.005	0.281
Cyto	A0R2I0	MSMEG_5121	Aminotransferase	0.024	0.274
Cyto	A0R6D2	GlgX	Glycogen debranching enzyme GlgX	0.031	0.27
Cyto	A0R048	TrpD	Anthranilate phosphoribosyltransferase	0.047	0.27
Cyto	A0QSR5	MSMEG_1574	Glutamate decarboxylase	0.015	0.266
Cyto	A0R0Y6	MSMEG_4553	GAF domain, putative	0.045	-0.255
Cyto	A0QZ38	MSMEG_3885	DEAD/DEAH box helicase	0.031	-0.254
Cyto	A0R577	LysS	Lysine--tRNA ligase	0.036	0.247
Cyto	A0QW09	MSMEG_2766	Uncharacterized protein	0.027	-0.246
Cyto	A0QZ11	RbpA	RNA polymerase-binding protein RbpA	0.026	-0.246
Cyto	A0QX03	MSMEG_3126	SUF system FeS assembly protein, NifU family protein	0.042	-0.245
Cyto	A0QUH1	MSMEG_2205	Putative acyl-CoA dehydrogenase	0.018	0.245
Cyto	A0R234	MSMEG_4971	Oxidoreductase	0.042	0.245
Cyto	A0QP10	MSMEG_0233	Lipoprotein Lpps	0.041	0.237
Cyto	A0QTZ4	MSMEG_2019	Short-chain dehydrogenase/reductase SDR	0.029	-0.235
Cyto	A0QQU5	GroL1	60 kDa chaperonin 1	0.012	0.231
Cyto	A0R417	GltA	Citrate synthase	0.042	0.231
Cyto	A0QR18	HemC	Porphobilinogen deaminase	0.027	0.22
Cyto	A0QWN3	AspS	Aspartate--tRNA(Asp/Asn) ligase	0.044	0.22
Cyto	A0QZ54	Mpa	Proteasome-associated ATPase	0.002	0.22
Cyto	A0R0C8	MSMEG_4342	Metallo-beta-lactamase family protein	0.025	0.219
Cyto	A0R4Z5	MSMEG_6008	Acetyl-CoA acetyltransferase	0.034	0.219
Cyto	A0QU52	MSMEG_2079	Alcohol dehydrogenase	0.015	0.216
Cyto	A0QVM0	ProS	Proline--tRNA ligase	0.016	0.214
Cyto	A0QZ17	CobN	Cobaltochelatase, CobN subunit	0.025	0.21
Cyto	A0QUX1	GatB	Aspartyl/glutamyl-tRNA(Asn/Gln) amidotransferase subunit B	0.014	0.202
Cyto	A0R5V7	MSMEG_6328	Uncharacterized protein	0.003	0.2
Cyto	A0R298	MSMEG_5037	Oxidoreductase, FAD-binding	0.043	0.195
Cyto	A0R4R3	KshA	3-ketosteroid-9-alpha-monooxygenase, oxygenase component	0.005	0.194
Cyto	A0QU07	MSMEG_2033	Oxidoreductase, zinc-binding dehydrogenase family protein	0.008	-0.194
Cyto	A0R0B2	FabD	Malonyl CoA-acyl carrier protein transacylase	0.049	0.189
Cyto	A0QTP2	SigH	ECF RNA polymerase sigma factor SigH	0.01	0.186
Cyto	A0QYD3	MSMEG_3618	Alanine and proline-rich secreted protein apa	0.001	-0.183
Cyto	A0QRD3	MenB	1,4-dihydroxy-2-naphthoyl-CoA synthase	0.027	0.181
Cyto	A0QSG8	RplO	50S ribosomal protein L15	0.045	0.181
Cyto	A0QSU4	MSMEG_1603	Uncharacterized oxidoreductase MSMEG_1603/MSMEI_1564	0.007	0.179
Cyto	A0QSL8	RpoA	DNA-directed RNA polymerase subunit alpha	0.016	0.173
Cyto	A0QTT2	MSMEG_1954	ABC1 family protein	0.026	0.172
Cyto	A0QQI4	PurT	Formate-dependent phosphoribosylglycinamide formyltransferase	0.037	0.171
Cyto	A0QS39	RpmG1	50S ribosomal protein L33 1	0.048	-0.162
Cyto	A0QQC9	GrpE	Protein GrpE	0.01	-0.161
Cyto	A0QVQ5	Pnp	Polyribonucleotide nucleotidyltransferase	0.033	0.159
Cyto	A0R214	PrfA	Peptide chain release factor 1	0.046	0.156
Cyto	A0R334	MSMEG_5325	Uncharacterized protein	0.045	-0.155
Cyto	A0QU64	MSMEG_2092	D-aminopeptidase	0.048	0.151
Cyto	A0QWX9	Tal	Transaldolase	0.049	0.15
Cyto	A0QXD0	XylB	Xylulose kinase	0.039	0.148
Cyto	A0QT04	MSMEG_1665	Aldehyde dehydrogenase (NAD) family protein	0.044	0.142
Cyto	A0QZA1	MSMEG_3950	Universal stress protein MSMEG_3950/MSMEI_3859	0.038	0.136
Cyto	A0R729	GlpK	Glycerol kinase	0.028	-0.135
Cyto	A0QV14	Pyc	Pyruvate carboxylase	0.013	0.132
Cyto	A0QQJ4	Fgd	F420-dependent glucose-6-phosphate dehydrogenase	0.007	0.13
Cyto	A0QTF4	MSMEG_1821	Acyl-CoA dehydrogenase	0.011	-0.117
Cyto	A0R3E3	MSMEG_5442	Glutamate dehydrogenase	0.022	0.108
Cyto	A0R012	FtsZ	Cell division protein FtsZ	0.049	-0.093
Cyto	A0QRD6	MSMEG_1078	Hydrolase	0.031	0.089
